# Supplementary material for: Facile synthesis and selected characteristics of two-dimensional material composed of iron sulfide and magnesium-based hydroxide layers (tochilinite)
Source: Royal Society of Chemistry journal article supplement (doi:10.1039/d3nj00758h), 2023-01-01
Supplement: d3nj00758h1.pdf [file d3nj00758h1.pdf]

## Electronic Supplementary Information for

### Facile synthesis and selected characteristics of two-dimensional material composed of iron sulfide and magnesium-based hydroxide layers (tochilinite)

Yuri L. Mikhlin,<sup>a,\*</sup> Roman V. Borisov,<sup>a,c</sup> Maxim N. Likhatski,<sup>a,\*</sup> Oleg A. Bayukov,<sup>b</sup> Yuriy V. Knyazev,<sup>b</sup> Sergey M. Zharkov,<sup>b,c</sup> Sergey A. Vorobyev,<sup>a</sup> Yevgeny V. Tomashevich,<sup>a</sup> Anastasiya D. Ivaneeva,<sup>a</sup> Anton A. Karacharov,<sup>a</sup> Denis V. Karpov,<sup>a</sup> Dmitriy A. Velikanov,<sup>b</sup> Mikhail V. Rautskii,<sup>b</sup> Dmitry A. Smolyakov,<sup>b</sup> Anton S. Tarasov<sup>b,c</sup>

<sup>a</sup> *Institute of Chemistry and Chemical Technology, Krasnoyarsk Science Center of the Siberian Branch of the Russian Academy of Sciences, Akademgorodok, 50/24, Krasnoyarsk, 660036, Russia*

<sup>b</sup> *Kirensky Institute of Physics, Krasnoyarsk Science Center of the Siberian Branch of the Russian Academy of Sciences, Akademgorodok 50/38, Krasnoyarsk, 660036, Russia*

<sup>c</sup> *Siberian Federal University, Svobodny av. 79, Krasnoyarsk, 660041, Russia*

\* corresponding authors, e-mail: yumikh@icct.ru; lixmax@icct.ru

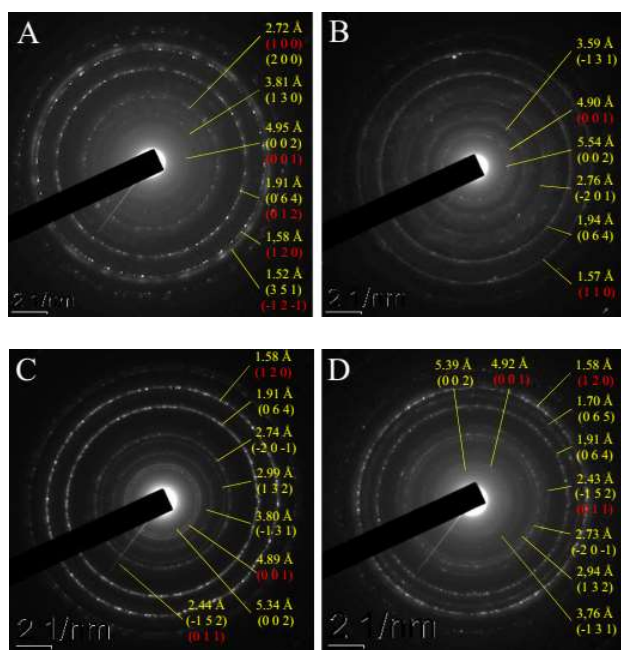

**Fig. S1** Typical selected area electron diffraction patterns for the tochilinite samples synthesized using the atomic proportions of precursors (A) Fe 2, Mg 1.5, S 15, (B) Fe 2, Mg 1.5, S 15, Al 0.5, (C) Fe 2, Mg 1.5, S 15, Li 0.5, (D) Fe 2, Mg 1.5, S 15, Co 0.5. Reflections of brucite impurity are marked in red.

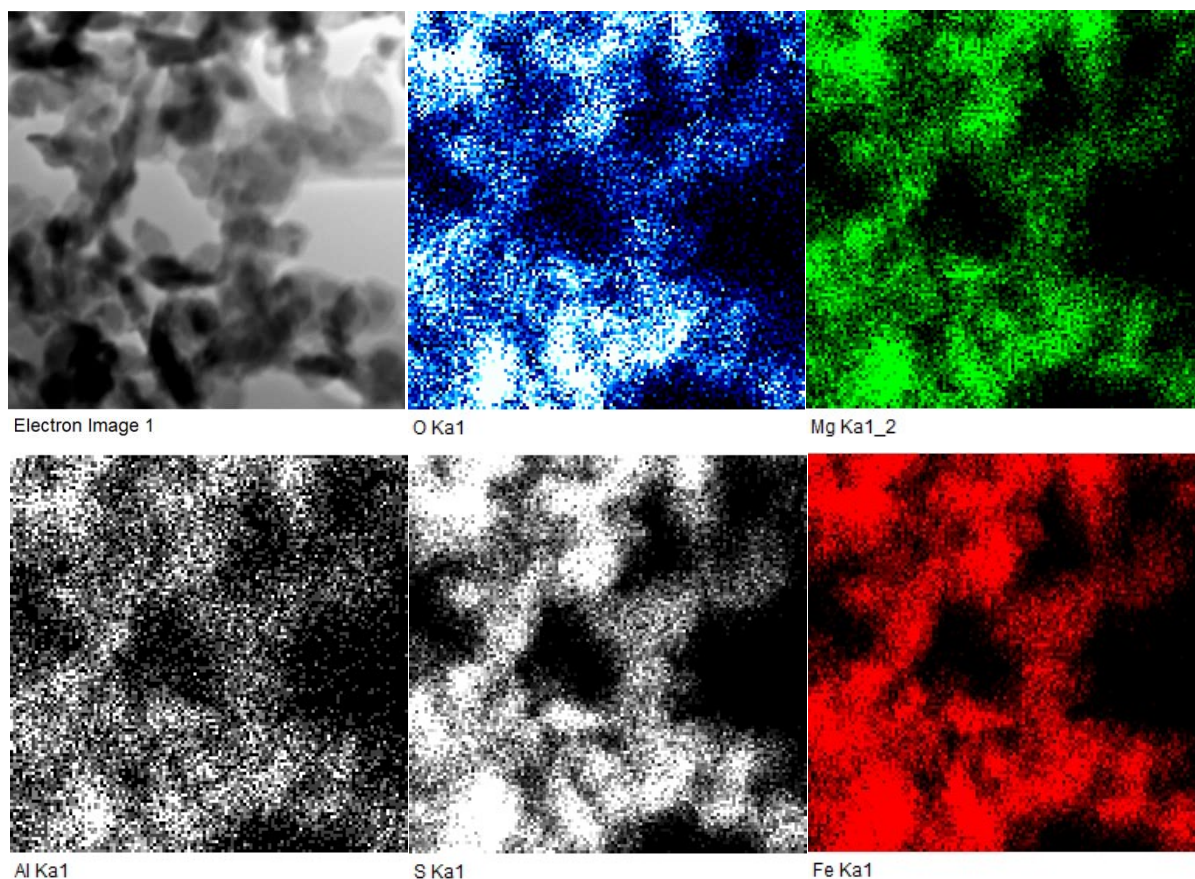

**Fig. S2** STEM image and corresponding EDS elemental maps for tochilinite prepared with the atomic proportions of precursors Fe 2, Mg 1.7, S 15, Al 0.5.

**Table S1** Surface concentrations of elements (at. %) as determined from XPS spectra at synthetic tochilinite samples\* using the lines Fe 3p, S 2p, Mg 2s, O 1s, C 1s, Na 1s and Al 2s.

| Sample | Fe  | S    | Mg   | O    | C    | Na   | Al  |
|--------|-----|------|------|------|------|------|-----|
| a      | 5.9 | 12.2 | 15.0 | 32.9 | 33.4 | 0.54 | -   |
| b      | 3.7 | 9.8  | 10.7 | 30.0 | 41.9 | 0.57 | 3.3 |
| c      | 4.9 | 8.7  | 14.8 | 33.6 | 37.6 | 0.25 | -   |
| d      | 6.4 | 11.5 | 10.3 | 29.4 | 42.3 | 0.1  | -   |

\*initial atomic proportions of precursors (a) Fe 2, Mg 1.5, S 15, (b) Fe 2, Mg 1.5 Al 0.5, S 15, (c) Fe 2, Mg 1.5, Li 0.5, S 15, (d) Fe 2, Mg 1.7, S 3.

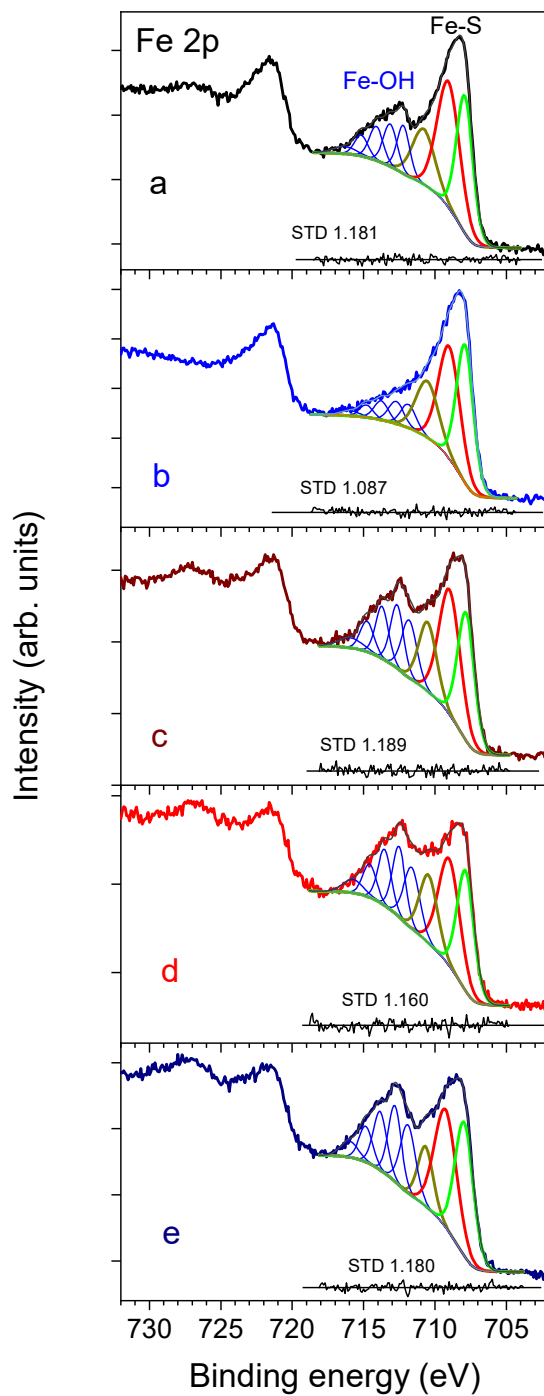

**Fig. S3** Photoelectron Fe 2p<sub>3/2,1/2</sub> of tochilinites synthesized using the atomic precursor proportions (a) Fe 2, Mg 1.5 S 15, (b) Fe 2 Mg 1.5 Al 0.5 S 0.5, S 15, (c) Fe 2 Mg 1.5 Li 0.5, S 15, (d) Fe 2 Mg 1.5 Li 1.0, S 15, (e) Fe 2 Mg 1.7 S 3, with the low-energy region fitted using three Gaussian-Lorentzian peaks.

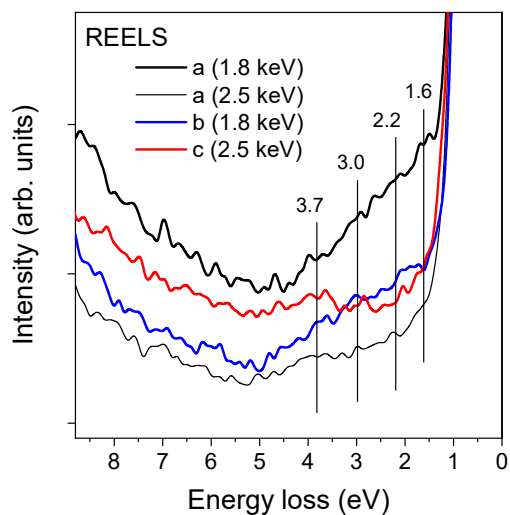

**Fig. S4** REELS of toehilinites synthesized with the atomic proportions of precursors (a) Fe 2, Mg 1.5, S 15, (b) Fe 2, Mg 1.5 Al 0.5, S 15, (c) Fe 2, Mg 1.5, Li 0.5, S 15, (d) Fe 2, Mg 1.7, S 3. Values 1.8 keV and 2.5 keV in parentheses stand for energies of primary electrons.

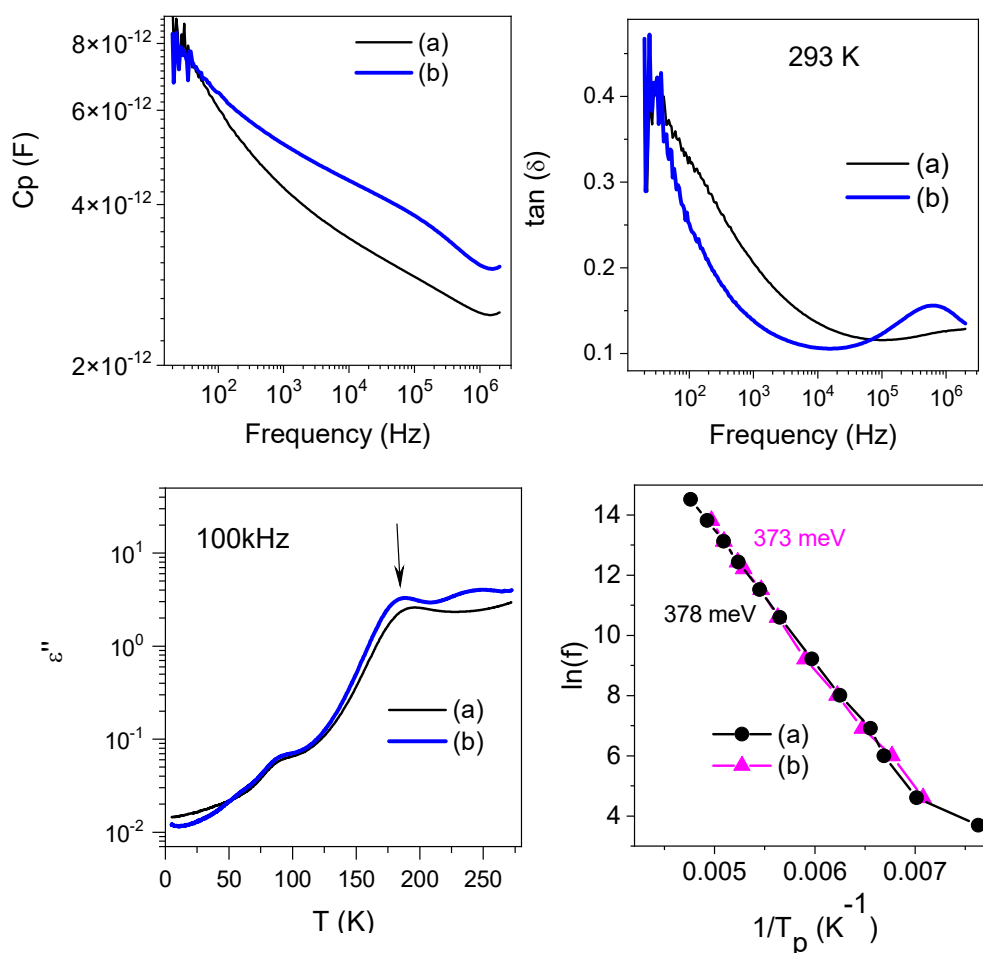

**Fig. S5** Capacitance  $C_p$ , dielectric loss tangent  $\tan(\delta)$ , imaginary part of dielectric permittivity  $\epsilon''$ , and peak frequency  $\ln(f)$  vs reciprocal temperature (Arrhenius plot) for toehilinites prepared with the atomic ratios of precursors (a) Fe 2, Mg 1.5, S 15 and (b) Fe 2, Mg 1.5, S 15, Al 0.5, measured using the tableted materials.

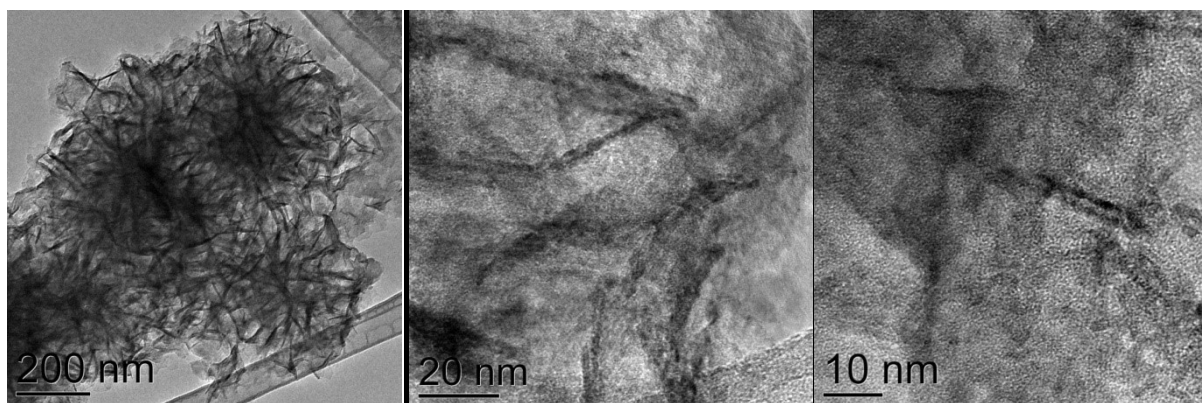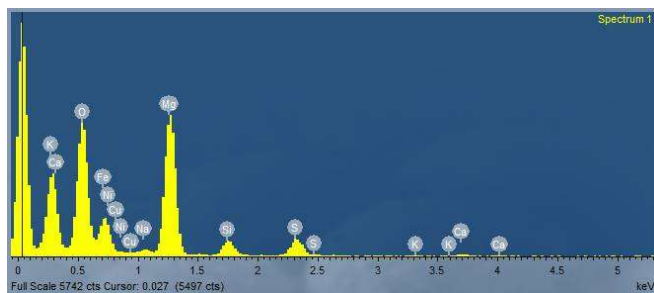

| O *   | Na   | Mg   | Si  | S   | K    | Ca   | Fe  | Ni** | Cu** |
|-------|------|------|-----|-----|------|------|-----|------|------|
| 55.32 | 0.87 | 25.2 | 2.2 | 2.4 | 0.09 | 0.19 | 8.9 | 4.0  | 0.73 |

\*All the concentrations are in at. %

\*\*Ni is due to Ni TEM grid, Cu appears due to the standard TEM retainer.

**Fig. S6** TEM images, and EDS data acquired from the intermediary products formed at room temperature for the atomic proportion of reagents Fe 2, Mg 2, S 15.
